# Supplementary material for: Effects of bacterial lipopolysaccharides on platelet function: inhibition of weak platelet activation
Source: PubMed Central journal article supplement (PMC7378070; doi:10.1038/s41598-020-69173-x), 2020-07-23
Supplement: 41598_2020_69173_MOESM1_ESM.pdf [file 41598_2020_69173_MOESM1_ESM.pdf]

## ***Supporting Information***

### **Effects of bacterial Lipopolysaccharides on platelet function: inhibition of weak platelet activation**

Alexey A. Martyanov<sup>1,2,3,4\*</sup>, Aleksandr S. Maiorov<sup>1</sup>, Aleksandra A. Filkova<sup>1,2,4</sup>, Elena O. Artemenko<sup>1,2</sup>, Galina A. Svidelskaya<sup>4</sup>, Alexander A. Ryabykh<sup>1,2</sup>, Stepan P. Gambaryan<sup>5</sup>, Mikhail A. Panteleev<sup>1,2,4</sup> and Anastasia N. Sveshnikova<sup>1,2,4,6</sup>

1 Center for Theoretical Problems of Physico-Chemical Pharmacology, Russian Academy of Sciences, 30 Srednyaya Kalitnikovskaya str., Moscow, 109029, Russia

2 National Medical Research Center of Pediatric Hematology, Oncology and Immunology named after Dmitry Rogachev, 1 Samory Mashela St, Moscow, 117198, Russia

3 Institute for Biochemical Physics (IBCP), Russian Academy of Sciences (RAS), Russian Federation, Moscow, Kosyigina 4; 119334, Russia

4 Faculty of Physics, Lomonosov Moscow State University, 1/2 Leninskie gory, Moscow, 119991, Russia

5 Sechenov Institute of Evolutionary Physiology and Biochemistry, Russian Academy of Sciences, St. Petersburg 194223, Russia

6 Department of Normal Physiology, Sechenov First Moscow State Medical University, 8/2 Trubetskaya St., Moscow, 119991, Russia

\*To whom correspondence should be addressed: Alexey A. Martyanov, [aa.martyanov@physics.msu.ru](mailto:aa.martyanov@physics.msu.ru), <https://orcid.org/0000-0003-0211-6325>.

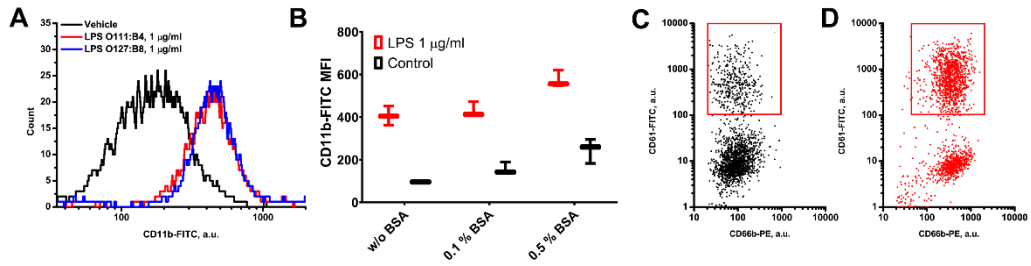

**Figure S1. PMN activation by LPSs.** (A) Preincubation with LPS resulted in the increase in CD11b activation on PMNs. (B) Introduction of BSA did not significantly affect LPS mediated increase in PMN CD11b activation. (C,D) Typical dot-plots of resting platelet-PMN suspension (C) and pre-incubated with LPS (D).

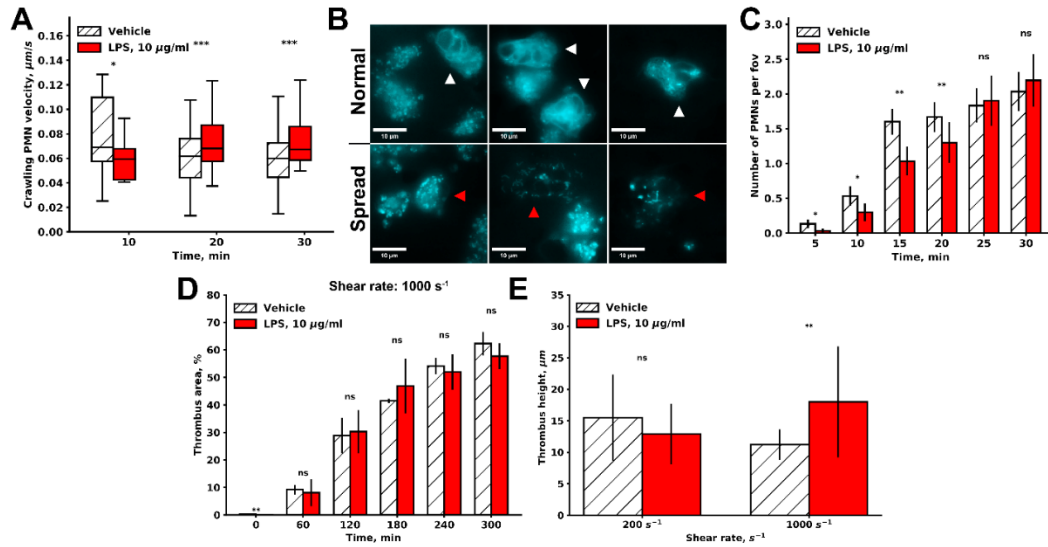

**Figure S2. Parallel-plate flow chamber whole blood experiments.** (A) LPSs slightly increased the velocity of crawling PMNs on fibrillar collagen and significantly increased the amount of highly spread PMNs (B); (C) LPS' effects on the number of PMNs per field of view were limited to a slight decrease at the early stages of thrombus formation; (D) Pre-incubation with LPS did not affected thrombus area at wall shear rate  $1000 \text{ s}^{-1}$ ; (E) LPSs slightly increased the average height of the growing thrombi at  $1000 \text{ s}^{-1}$ , while there was no significant impact at  $200 \text{ s}^{-1}$ . Bars represent mean, whiskers represent SEM. Significance was calculated by Mann-Witney test,  $n = 5$ , \* -  $p < 0.05$ , \*\* -  $p < 0.01$ , \*\*\* -  $p < 0.001$ .

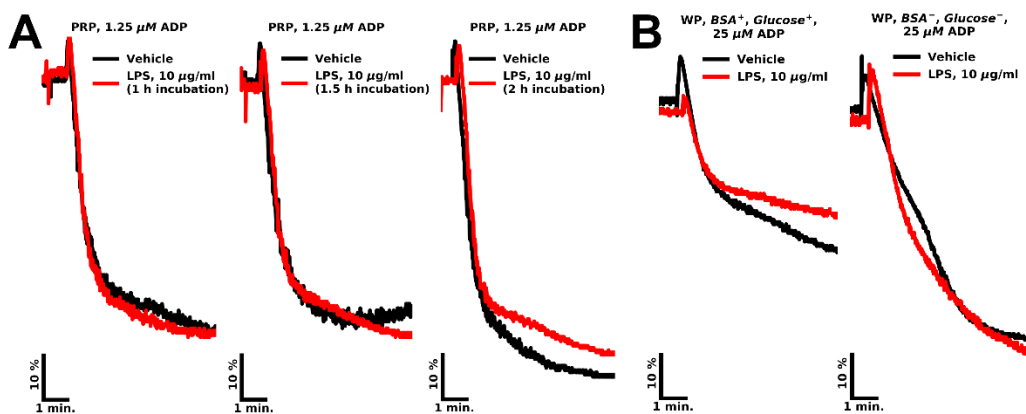

**Figure S3. Preincubation of platelets with LPS did not alter platelet aggregation.** Light transmission aggregometry, typical curves out of  $n = 10$ . (A) Platelet rich plasma from citrated blood. (B) Washed platelets in  $\text{BSA}^+$ ,  $\text{Glucose}^+$  and  $\text{BSA}^-$ ,  $\text{Glucose}^-$  Tyrode's buffer.

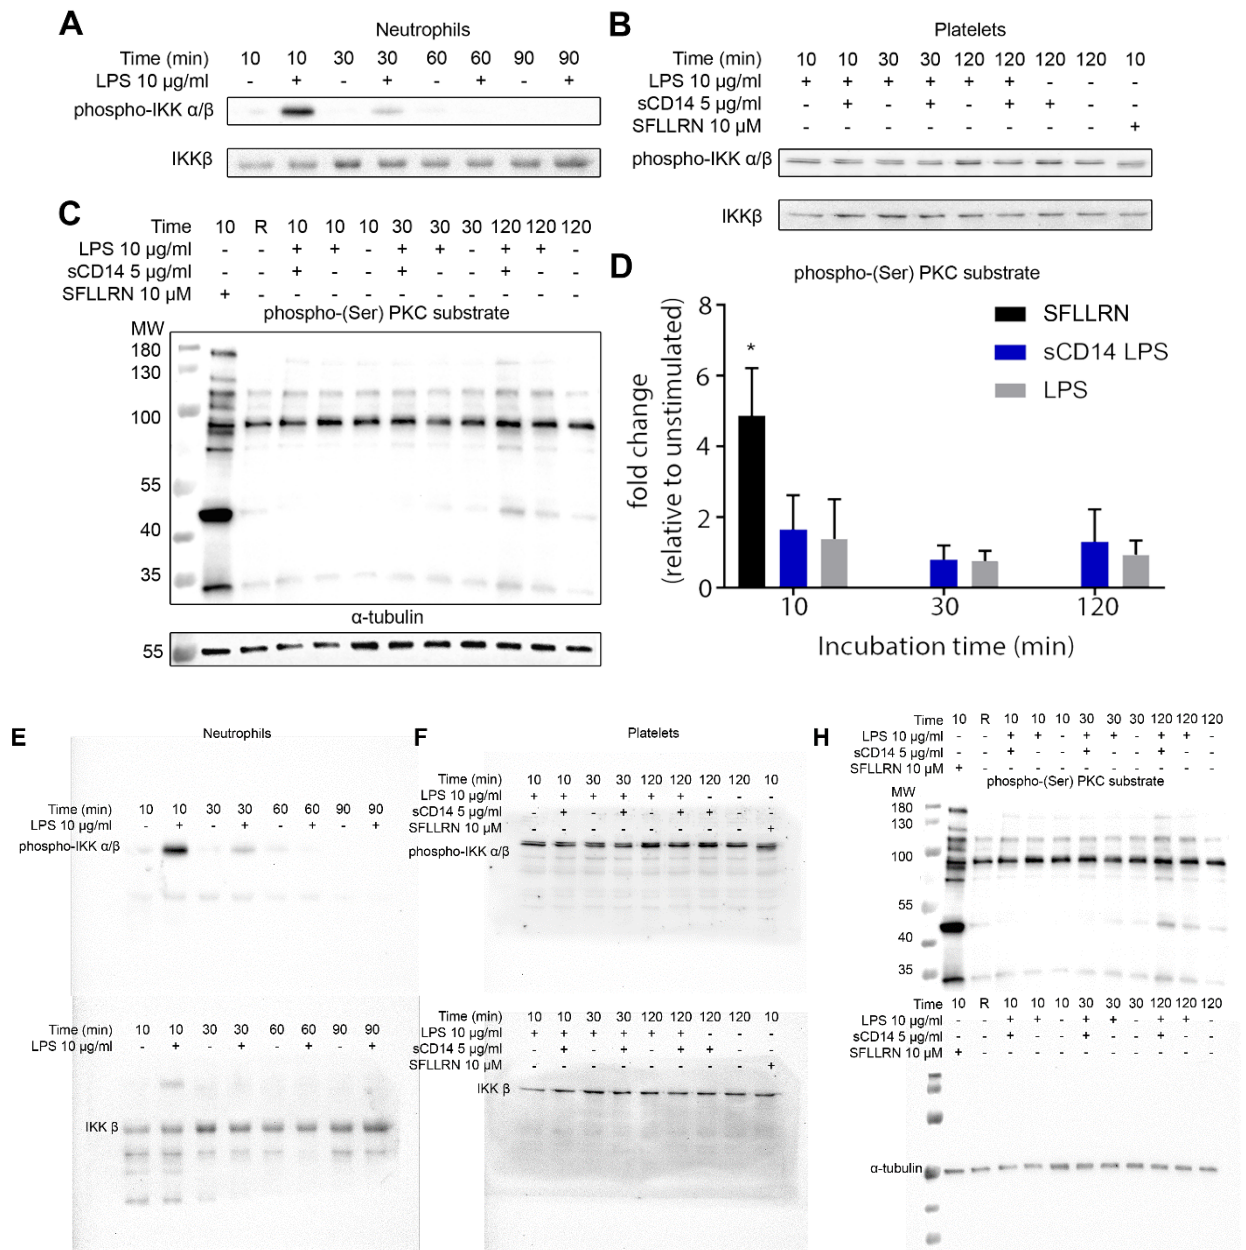

**Figure S4. IKk phosphorylation in response to LPSs.** (A) 10 minute pre-incubation with 10  $\mu$ g/ml LPS increased IKk  $\alpha/\beta$  phosphorylation, which decreased with the flow of time. Loading control was assessed using anti IKk  $\alpha/\beta$  antibodies after membrane stripping. (B) Neither 10  $\mu$ M of SFLLRN (TRAP-6) nor 10  $\mu$ g/ml LPS in the presence and absence of sSCD14 affected IK IKk  $\alpha/\beta$  phosphorylation in platelets. Loading control was assessed using anti IKk  $\alpha/\beta$  antibodies after membrane stripping. (C,D) Activation of platelets by 10  $\mu$ g/ml LPS or 10  $\mu$ g/ml LPS and sCD14 was non-significant in comparison to 10  $\mu$ M of SFLLRN (TRAP-6). Full length blots are provided in figure S6. (E-H). Full length western blots. (E) IKk  $\alpha/\beta$  phosphorylation in neutrophils after incubation with LPS for different time intervals. IKk  $\beta$  was used as loading control. (G) IKk  $\alpha/\beta$  phosphorylation in neutrophils after incubation with LPS for different time intervals or activation by 10  $\mu$ M of SFLLRN (TRAP-6). IKk  $\beta$  was used as loading control. (H) Ser phosphorylation (PKC substrate) in platelets activated by 10  $\mu$ M of SFLLRN (TRAP-6) or 10  $\mu$ g/ml of LPS for different time intervals.  $\alpha$ -tubulin was used as loading control.

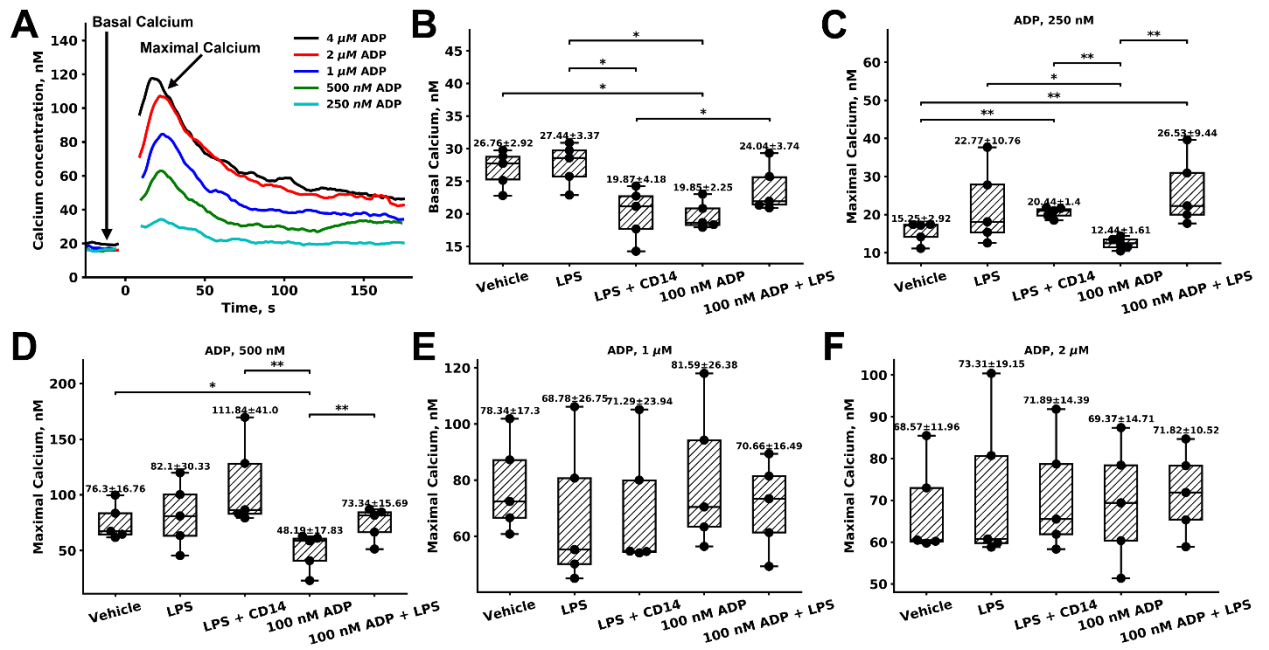

**Figure S5. LPS effects on platelet calcium signalling.** (A) Typical platelet suspension calcium response to ADP at different concentrations. (B) Basal calcium concentration in resting platelets upon pre-incubation with vehicle, 10  $\mu\text{g/ml}$  LPS, 10  $\mu\text{g/ml}$  LPS and 5  $\mu\text{g/ml}$  sCD14, 100 nM ADP, 100 nM ADP and 10  $\mu\text{g/ml}$  LPS for 30 minutes. (C-F) Calcium mobilization (Maximal calcium concentration minus basal calcium concentration) for platelets stimulated by 250 nM (C), 500 nM (D), 1  $\mu\text{M}$  (E) and 2  $\mu\text{M}$  (F) of ADP. Significance was calculated by Mann-Whitney test (\* -  $p < 0.05$ ; \*\* -  $p < 0.01$ ; \*\*\* -  $p < 0.001$ ;  $n = 5$ ).

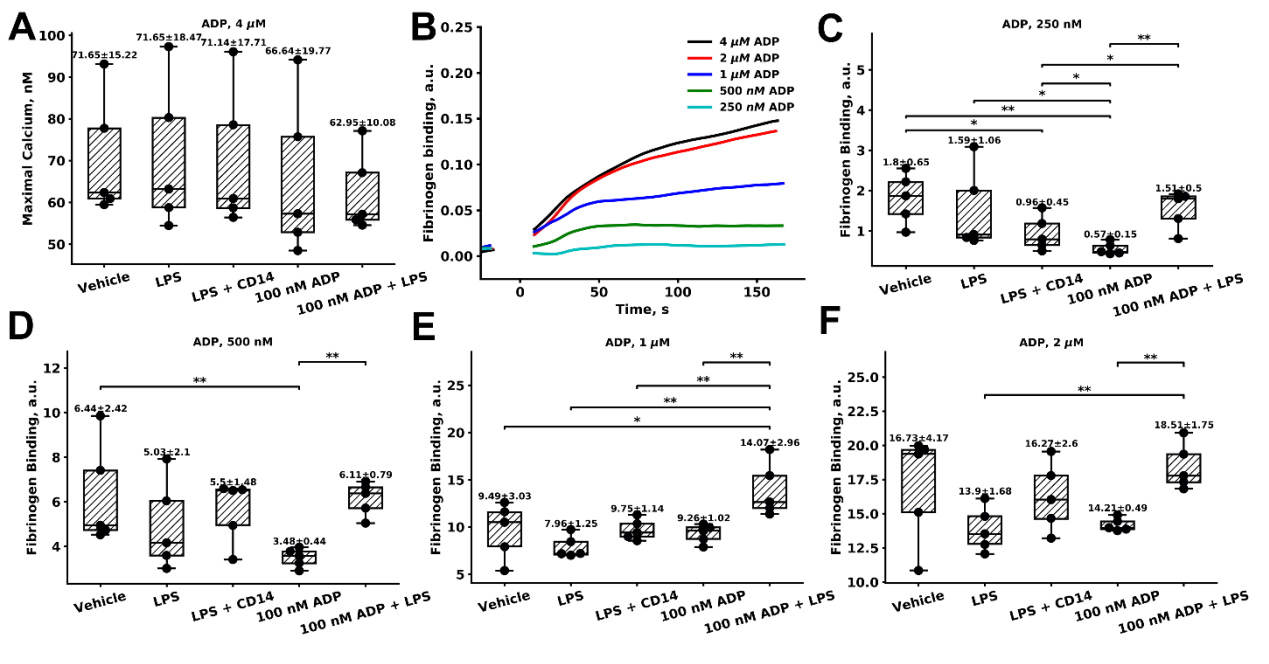

**Figure S6.** (A) Maximal calcium concentration upon stimulation by 4  $\mu\text{M}$  of ADP. (B) Characteristic fibrinogen binding changes upon stimulation of platelets by different concentrations of ADP in continuous flow cytometry experiments. (C-F) Fibrinogen binding upon pre-incubation of platelets with vehicle, 10  $\mu\text{g/ml}$  LPS, 10  $\mu\text{g/ml}$  LPS and 5  $\mu\text{g/ml}$  sCD14, 100 nM ADP, 100 nM ADP and 10  $\mu\text{g/ml}$  LPS activated by 250 nM (C), 500 nM (D), 1  $\mu\text{M}$  (E) and 2  $\mu\text{M}$  (F) of ADP. Significance was calculated by Mann-Whitney test (\* -  $p < 0.05$ ; \*\* -  $p < 0.01$ ; \*\*\* -  $p < 0.001$ ;  $n = 5$ ).

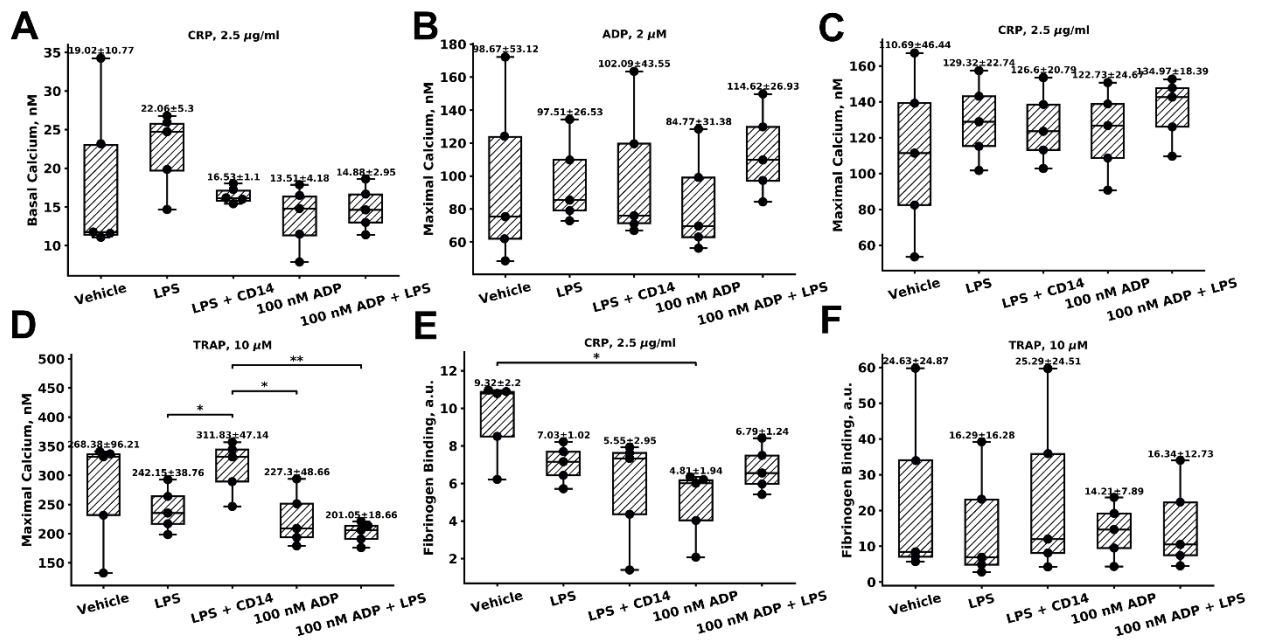

**Figure S7.** (A) Basal calcium concentration in resting platelets upon pre-incubation with vehicle, 10  $\mu\text{g}/\text{ml}$  LPS, 10  $\mu\text{g}/\text{ml}$  LPS and 5  $\mu\text{g}/\text{ml}$  sCD14, 100 nM ADP, 100 nM ADP and 10  $\mu\text{g}/\text{ml}$  LPS for 2 h. (B-D) Changes in calcium concentration (Maximal Calcium – Basal Calcium) for platelets stimulated by 2  $\mu\text{M}$  of ADP (B), 2.5  $\mu\text{g}/\text{ml}$  of CRP (C) and 10  $\mu\text{M}$  of SFLLRN (D) at different conditions in the continuous regime. (E,F) Maximal fibrinogen binding for platelets stimulated by 2.5  $\mu\text{g}/\text{ml}$  of CRP (E) and 10  $\mu\text{M}$  of SFLLRN (F) at different conditions in the continuous regime. Significance was calculated by Mann-Whitney test (\* -  $p < 0.05$ ; \*\* -  $p < 0.01$ ; \*\*\* -  $p < 0.001$ ,  $n = 5$ ).

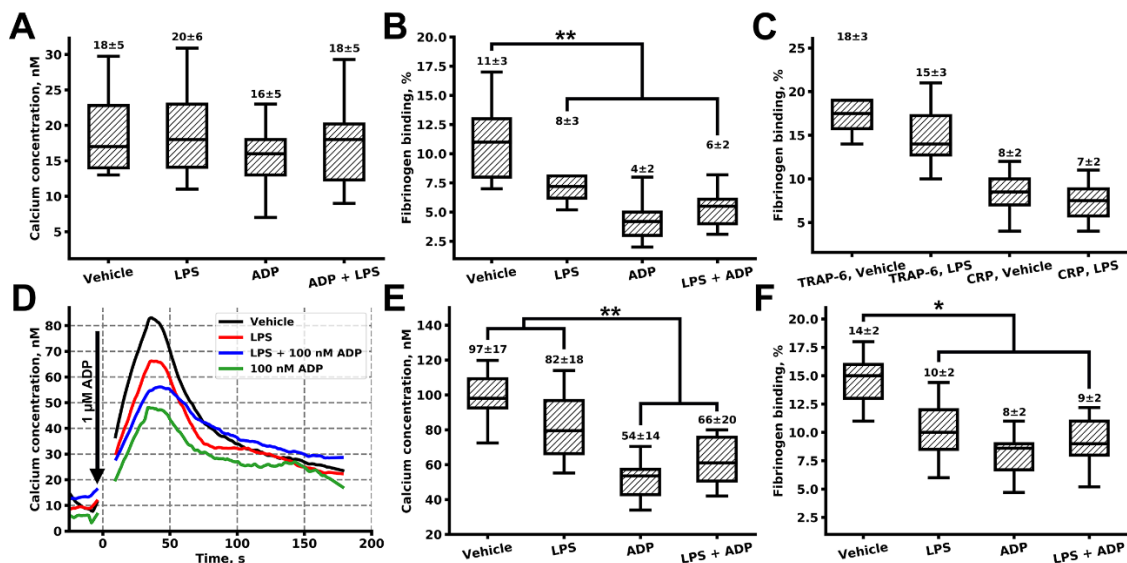

**Figure S8.** (A) Basal calcium concentration in resting platelets upon pre-incubation with vehicle, 100  $\mu\text{g}/\text{ml}$  LPS, 100 nM ADP or 100 nM ADP and 100  $\mu\text{g}/\text{ml}$  LPS. (B) Fibrinogen binding by platelets upon pre-incubation with vehicle, 100  $\mu\text{g}/\text{ml}$  LPS, 100 nM ADP or 100 nM ADP and 100  $\mu\text{g}/\text{ml}$  LPS and activation by 500 nM ADP. (C) Fibrinogen binding by platelets upon pre-incubation with vehicle or 100  $\mu\text{g}/\text{ml}$  LPS and activation by 1  $\mu\text{M}$  TRAP-6 or 1  $\mu\text{g}/\text{ml}$  CRP. (D) Typical cytosolic calcium concentration curves upon activation by 1  $\mu\text{M}$  ADP after pre-incubation with 100  $\mu\text{g}/\text{ml}$  LPS, 100  $\mu\text{g}/\text{ml}$  LPS and 100 nM ADP, 100 nM ADP or vehicle. (E,F) Pretreatment with LPS and ADP or sole ADP resulted in a significant decrease in a calcium (E) and fibrinogen (F) responses to 1  $\mu\text{M}$  ADP ( $n = 15$  donors, significance was calculated by Mann-Whitney test, \* -  $p < 0.05$ ; \*\* -  $p < 0.01$ ; \*\*\* -  $p < 0.001$ ).

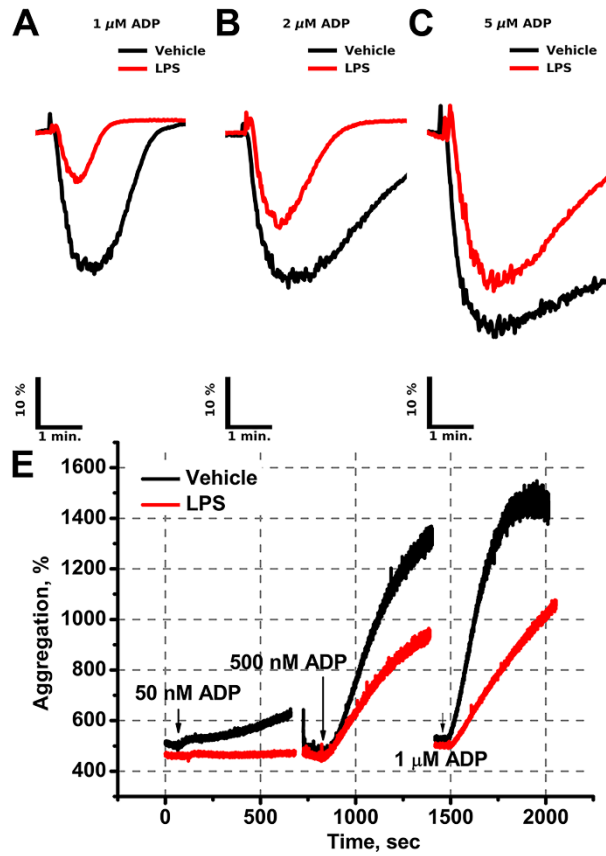

**Figure S9. LPS mediated alterations in platelet aggregation.** Pre-treatment with 100  $\mu$ g/ml of LPS resulted in a decrease in platelet aggregation in response to 1  $\mu$ M (A), 2  $\mu$ M (B) and 5  $\mu$ M of ADP (C). Platelet di-aggregate formation was impaired by LPS upon stimulation by all concentrations of ADP tested (E).
